# Supplementary material
Source: publisher figshare collection journal article supplement (https://karger.figshare.com/ndownloader/files/30638385)

# Online Supplementary Material 3 – Forest plots for incidence of patients with cognitive decline per time point per cognitive construct

## *Whole-brain radiotherapy*

### Short-term follow-up

Learning and memory [28,35,39,40]


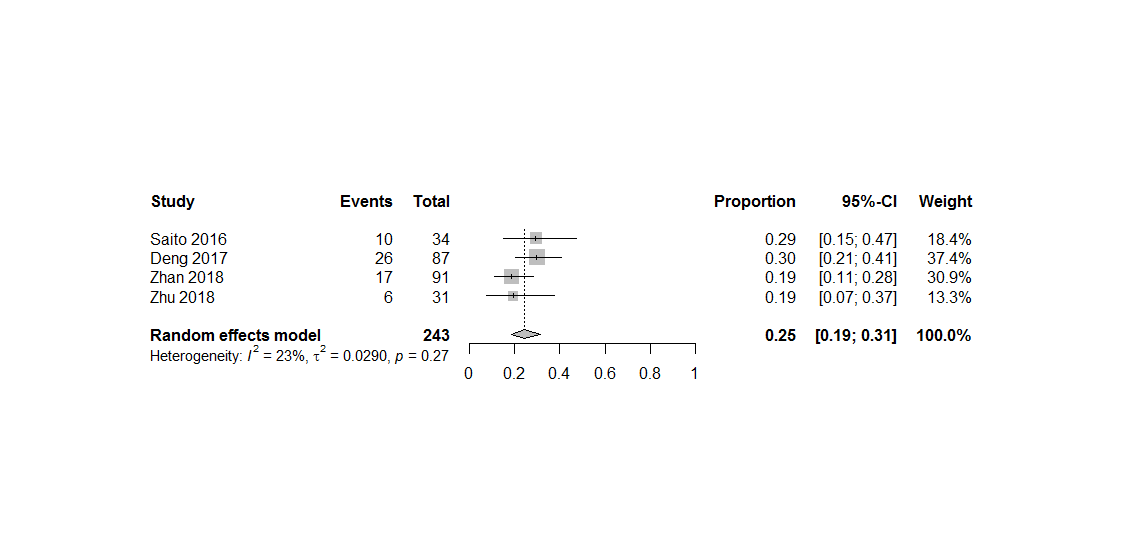


Executive function [35,40]


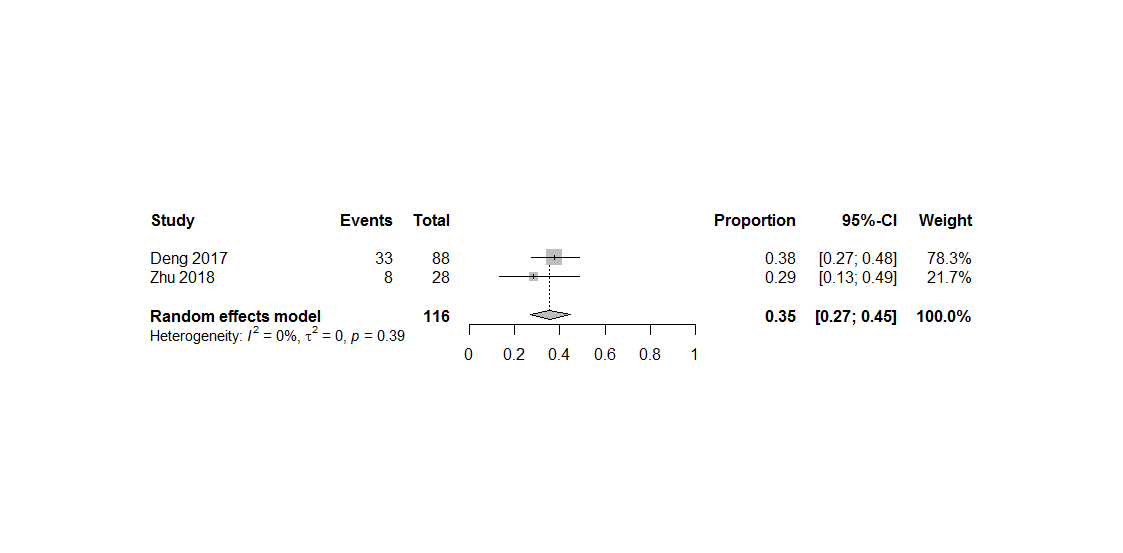


Verbal fluency [35,40]


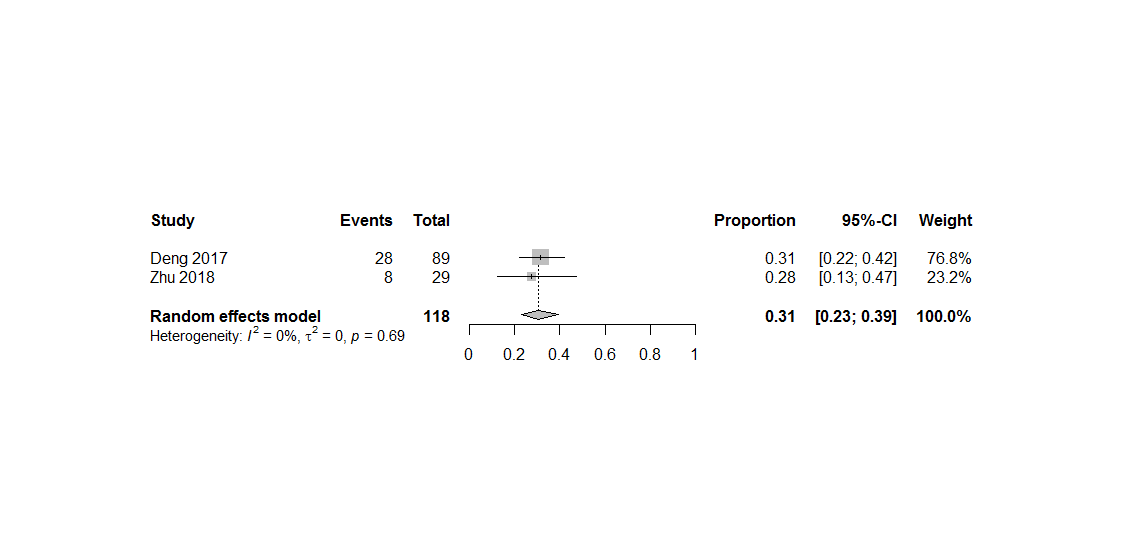


Information processing speed [35]


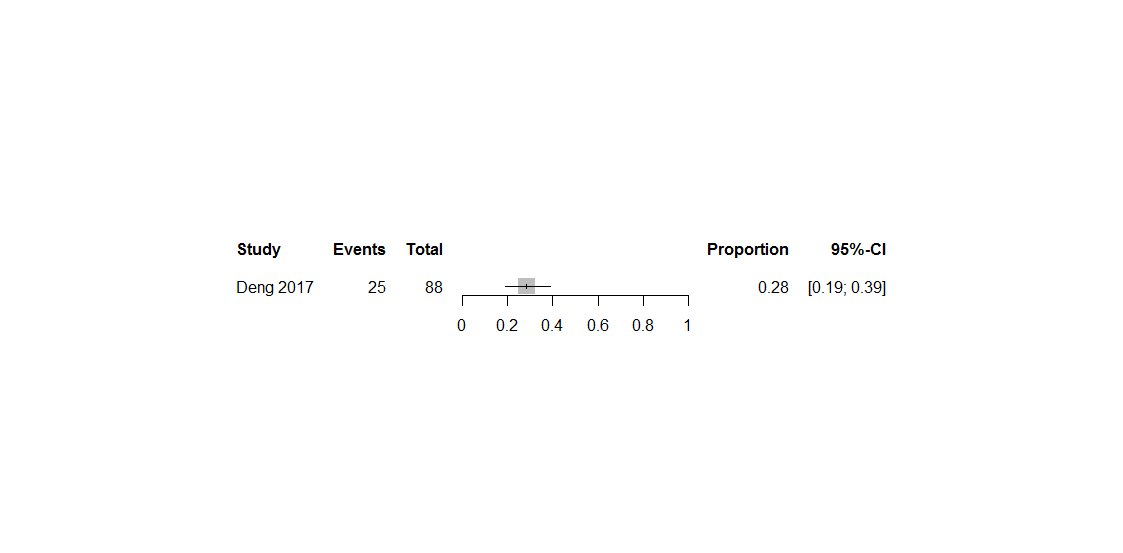


### Mid-term follow-up

Learning and memory [28,35,39,40]


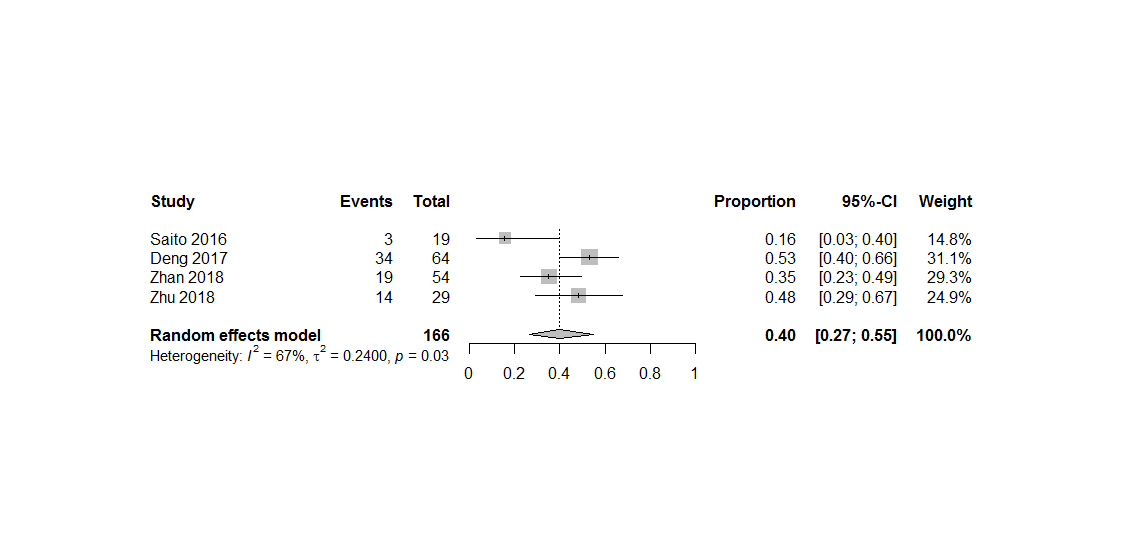


Executive function [35,40]


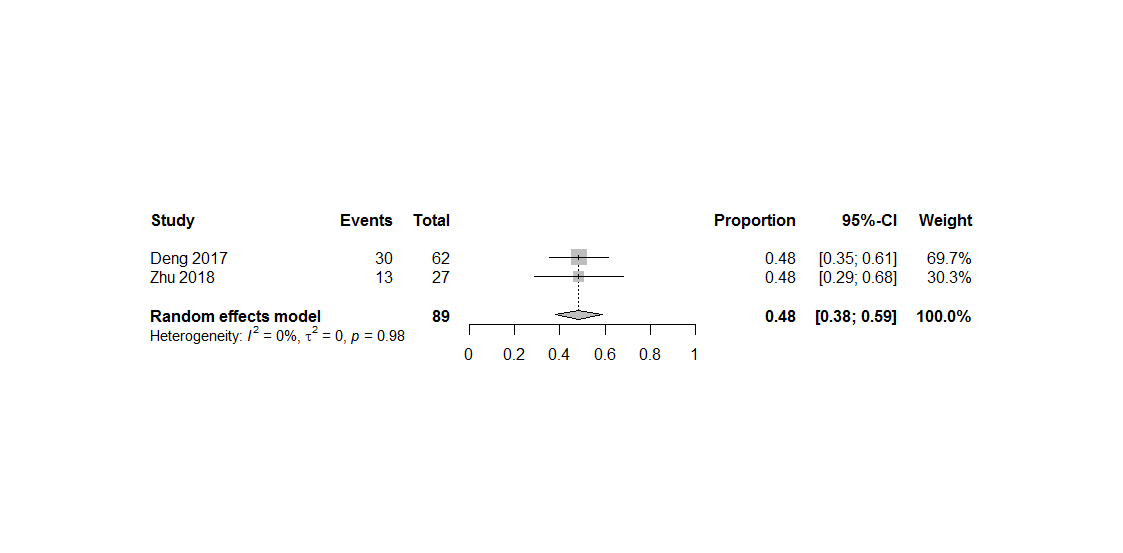


Verbal fluency [35,40]


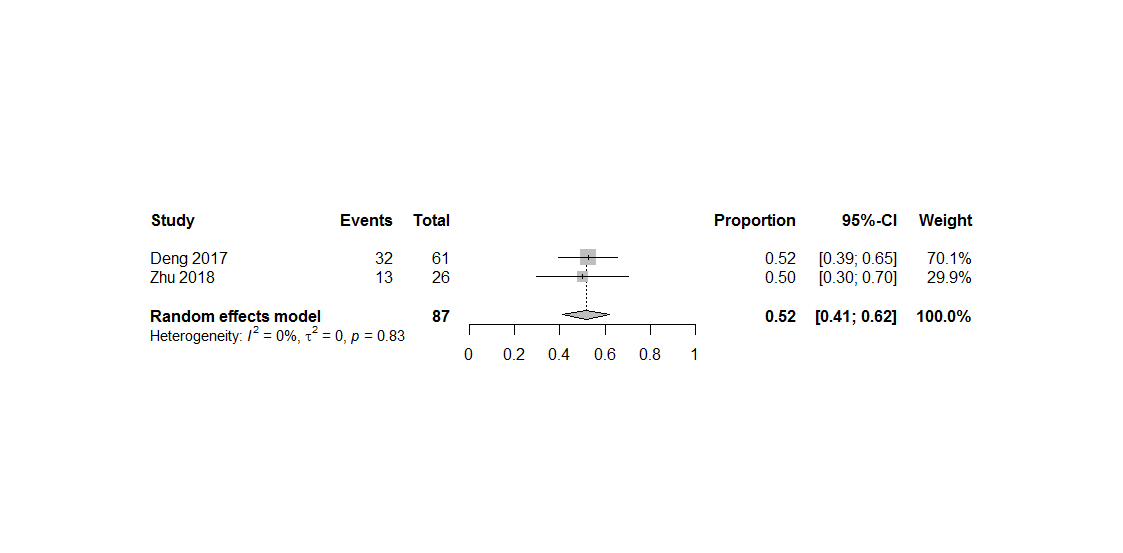


Information processing speed [35]


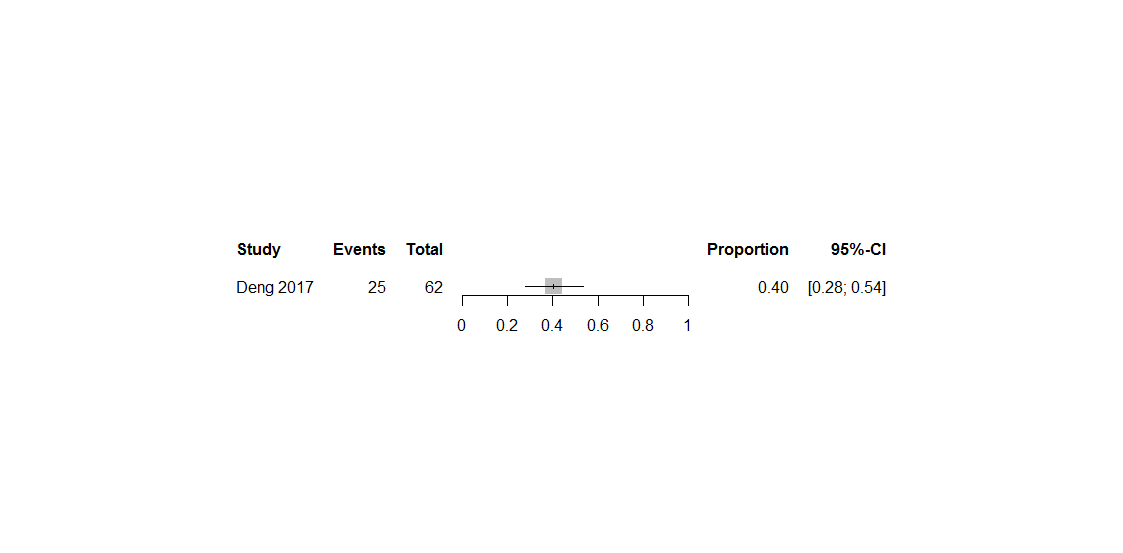


### Long-term follow-up

Learning and memory [40]


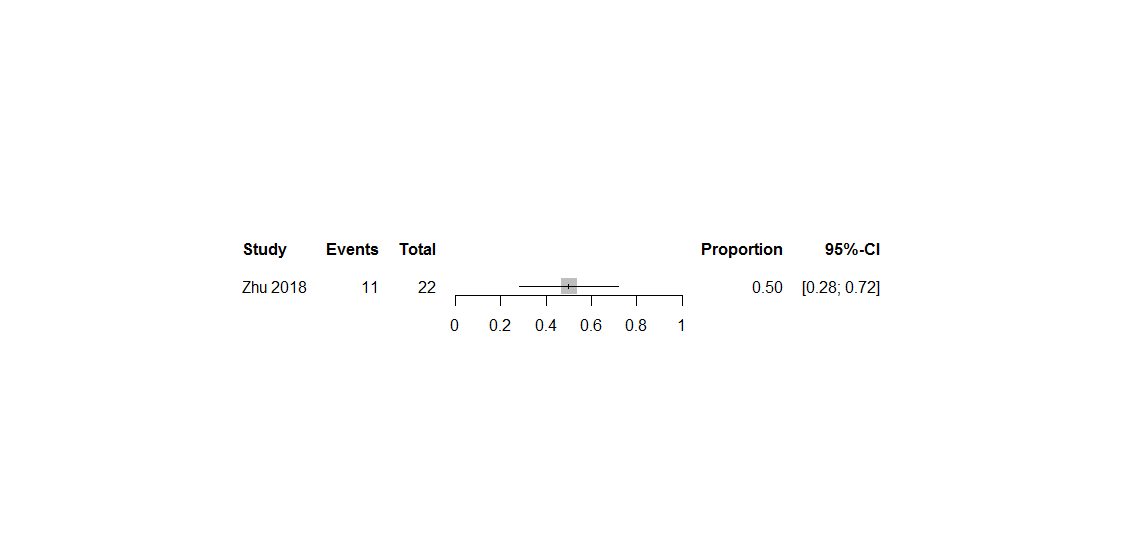


Executive function [40]


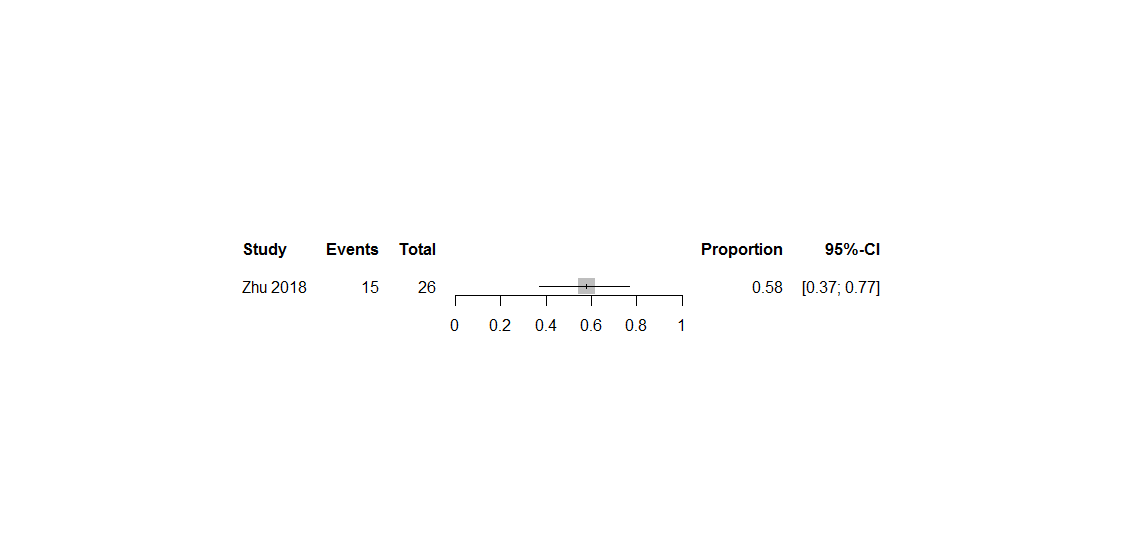


Verbal fluency [40]


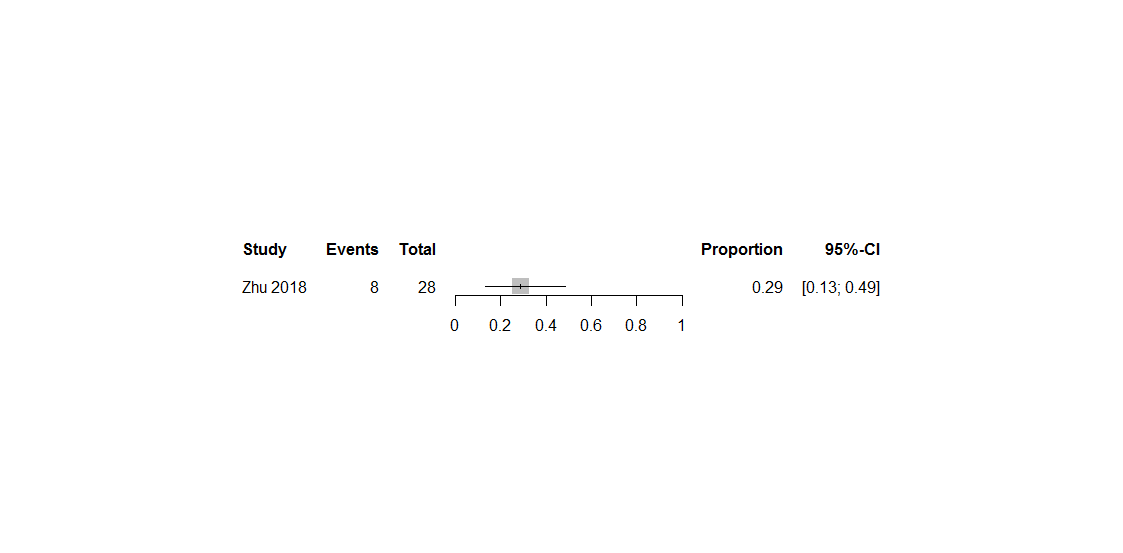


## *Stereotactic radiosurgery*

### Short-term follow-up

Learning and memory [29–32,42]


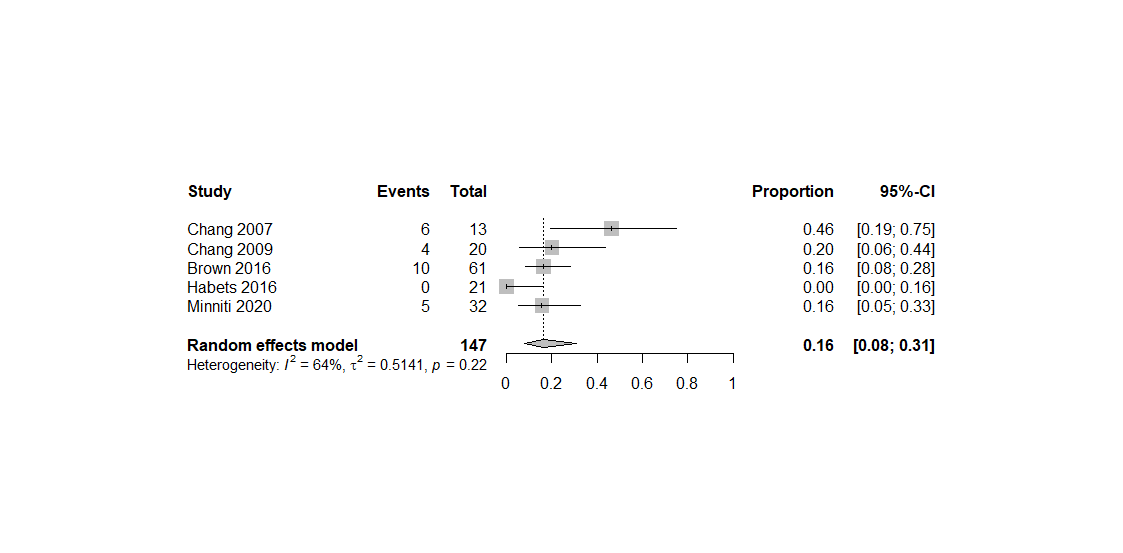


Executive function [29,30,32]


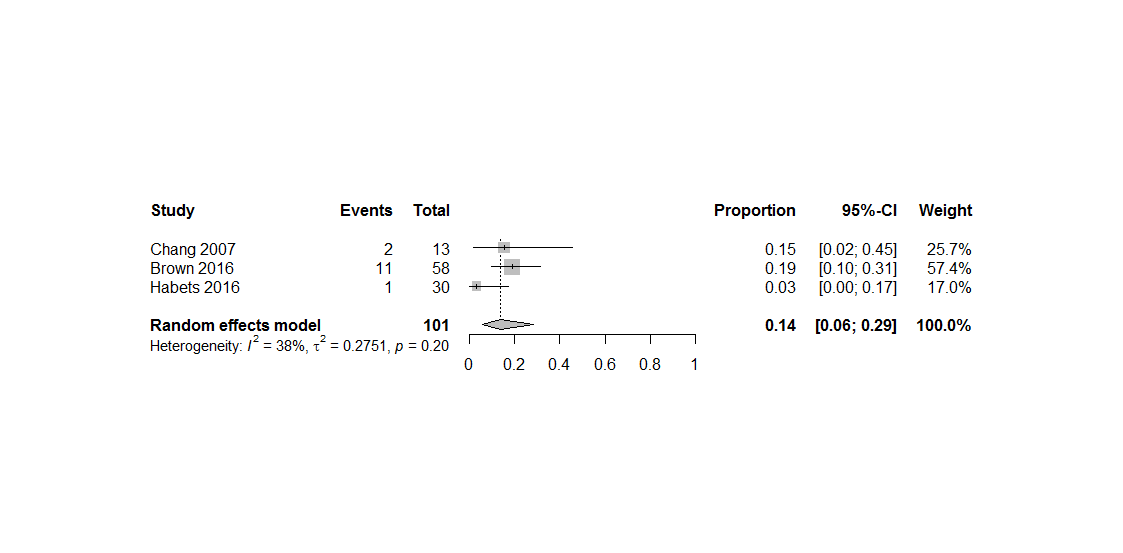


Verbal fluency [29,32]


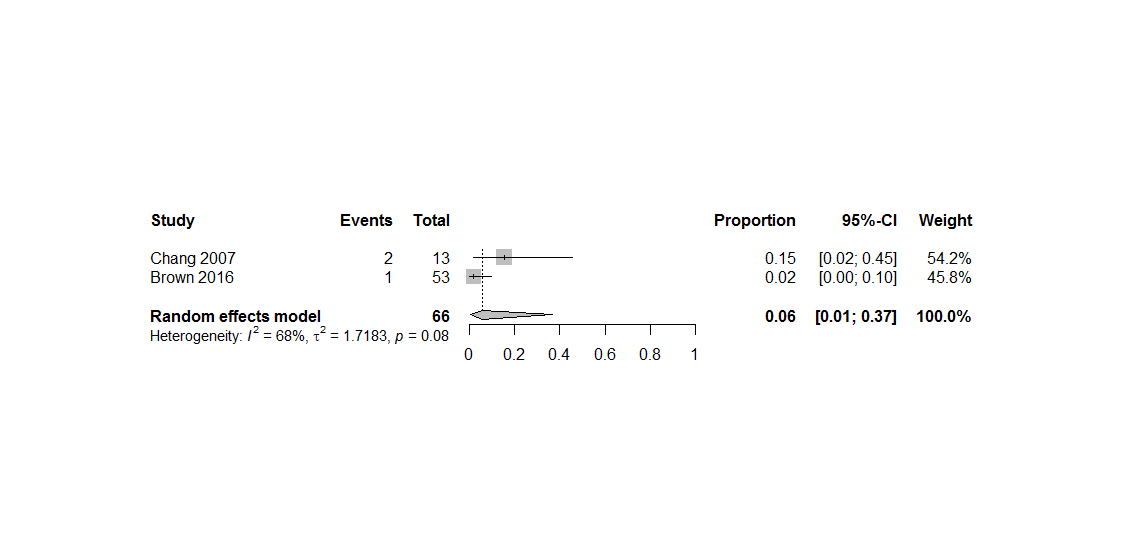


Information processing speed [29,30,32]


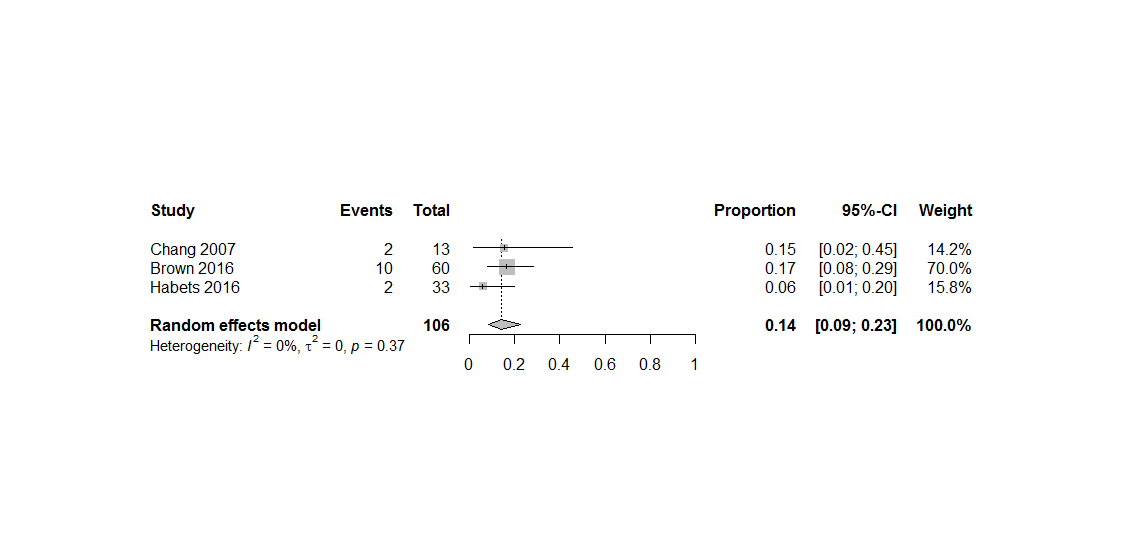


Fine motor coordination [29,32]


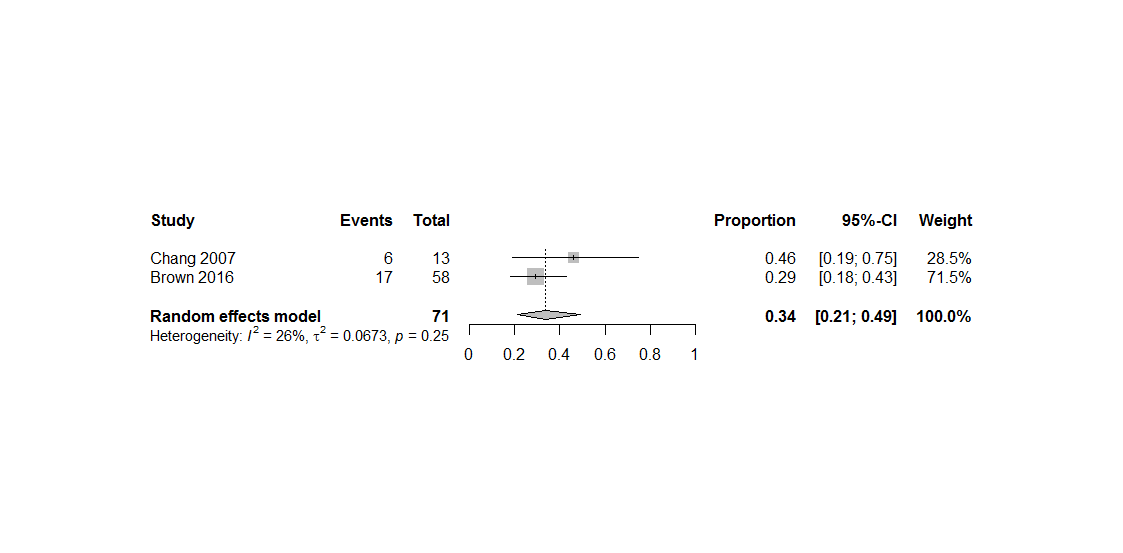


Attention [29,30]


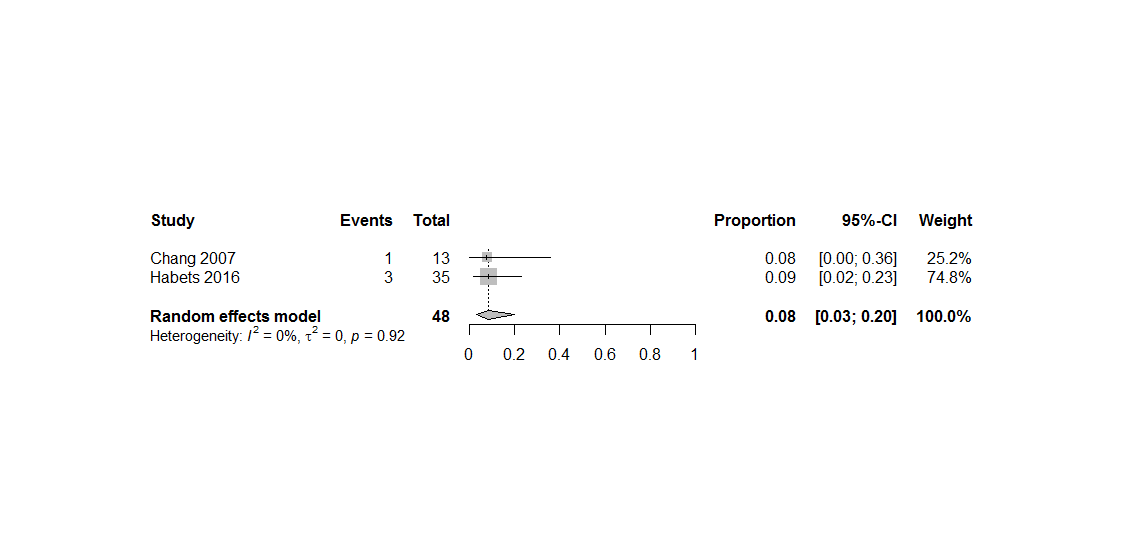


Visual memory and visuoconstruction [30]


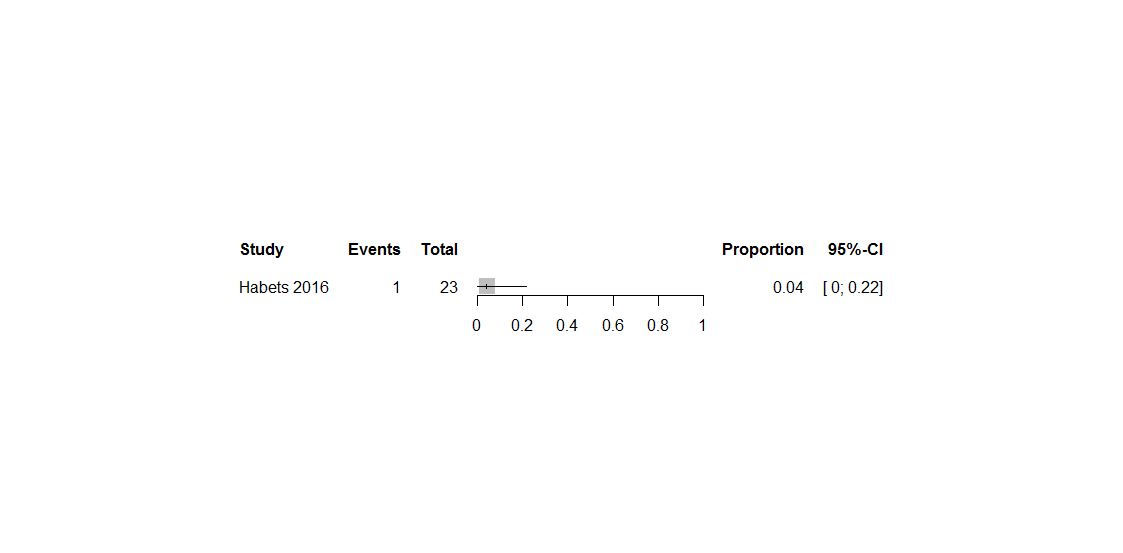


### Mid-term follow-up

Learning and memory [29,30,32,42]


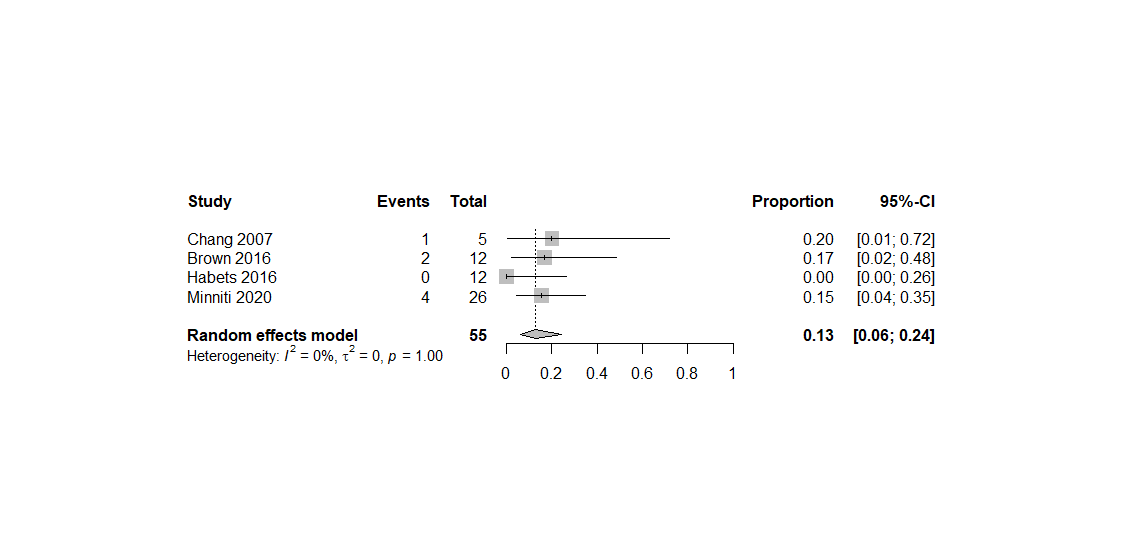


Executive function [29,30,32]


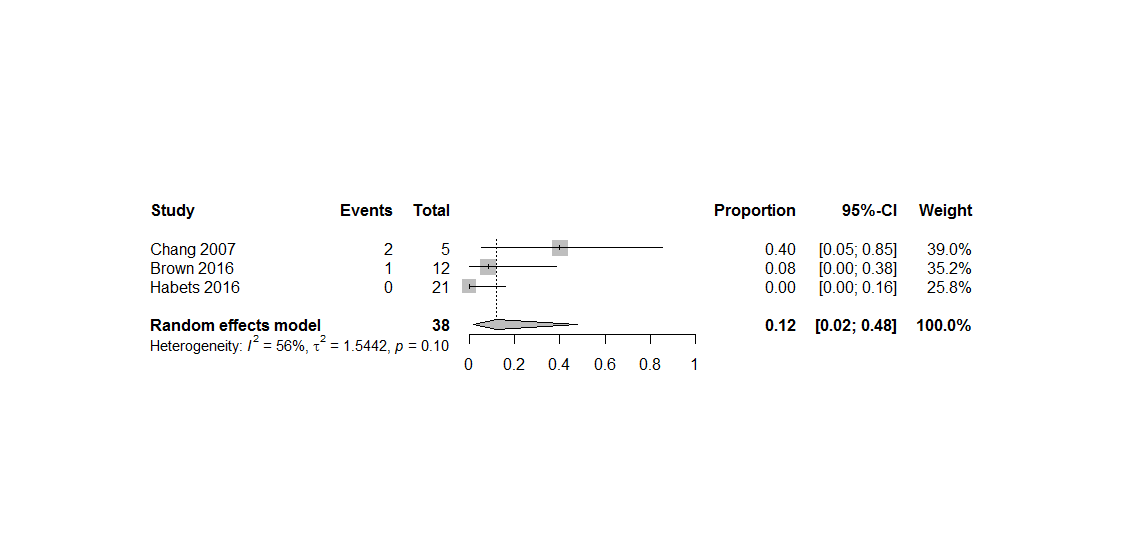


Verbal fluency [32]


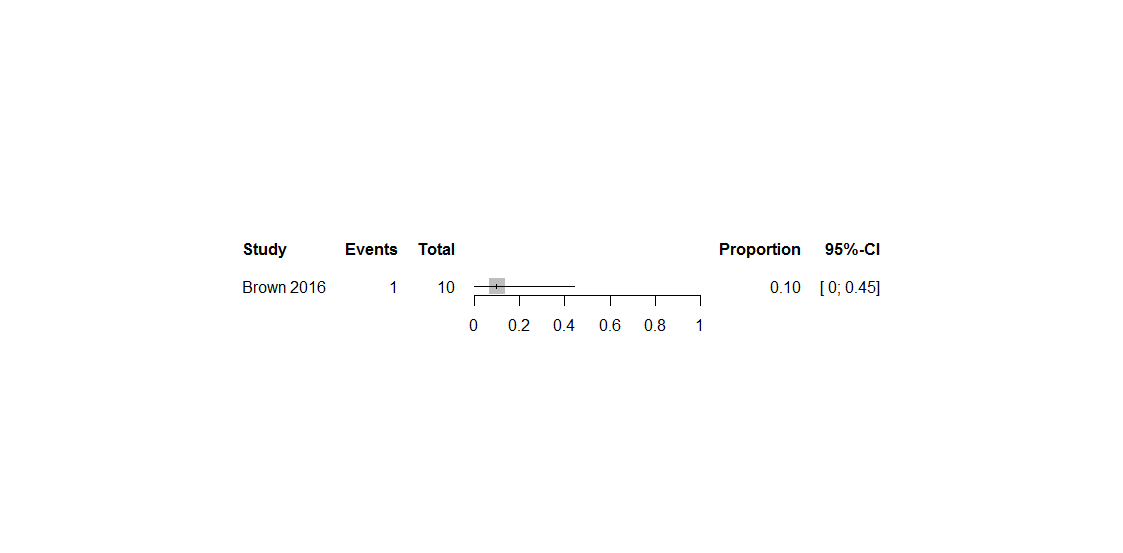


Information processing speed [30,32]


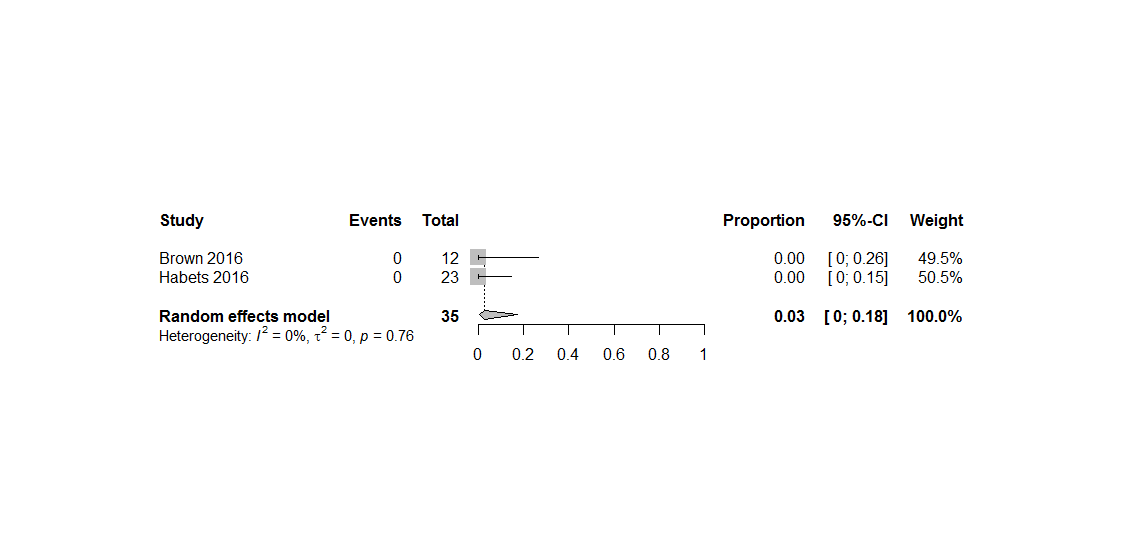


Fine motor coordination [29,32]


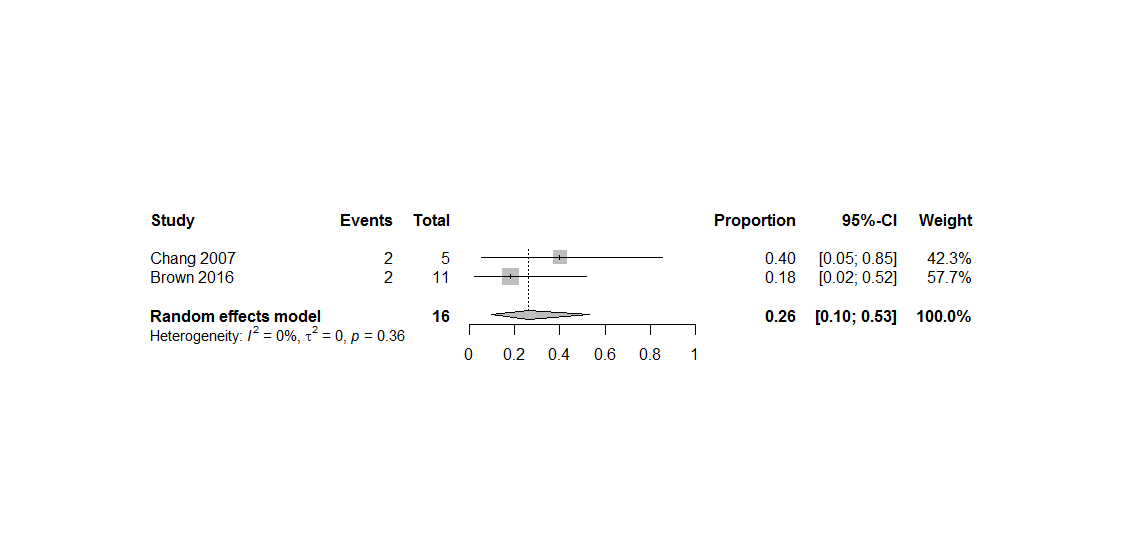


Attention [30]


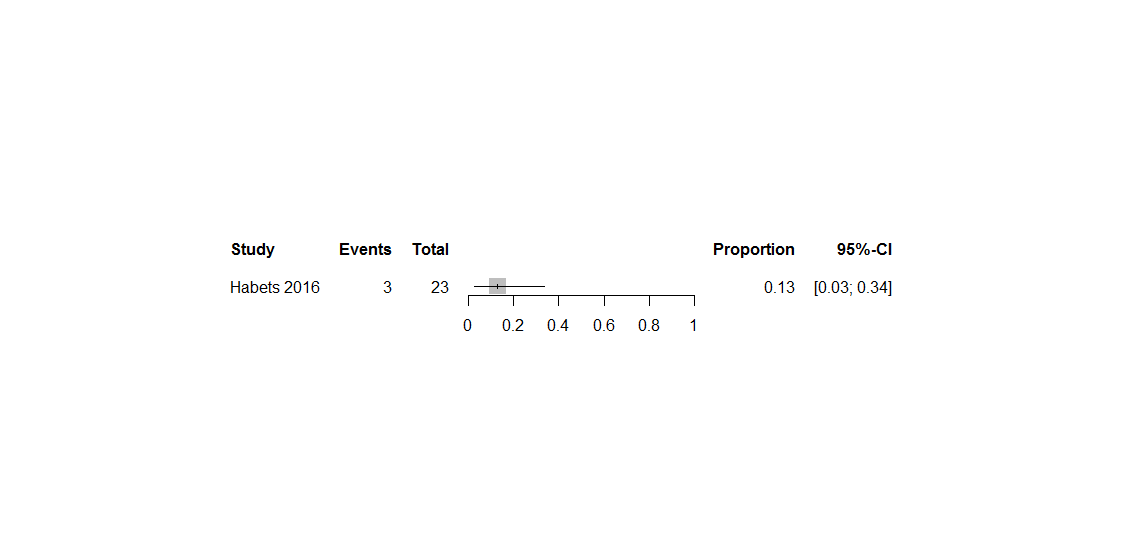


Visual memory and visuoconstruction [30]


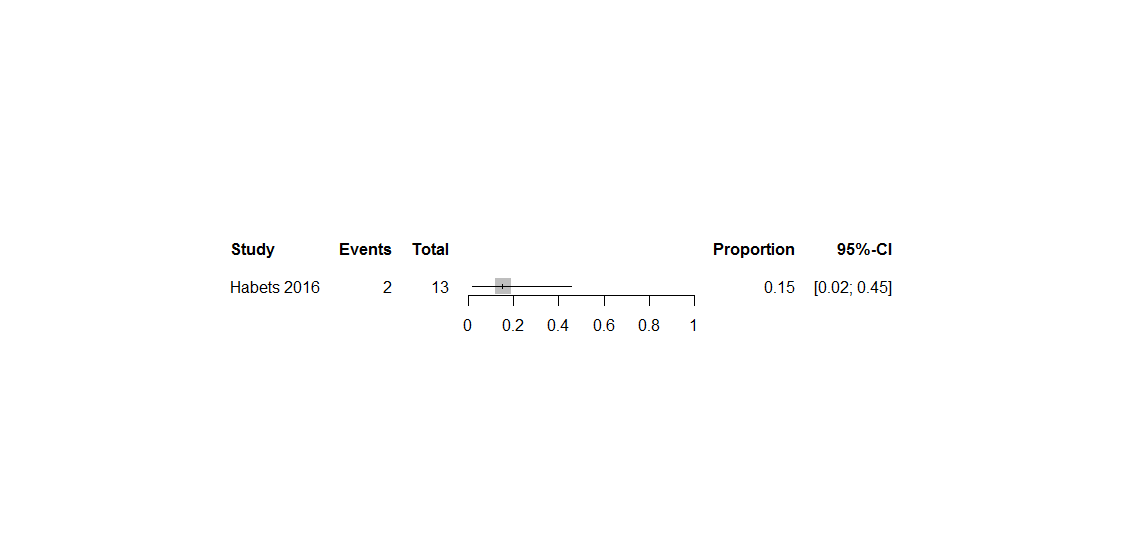


### Long-term follow-up

Learning and memory [32,42]


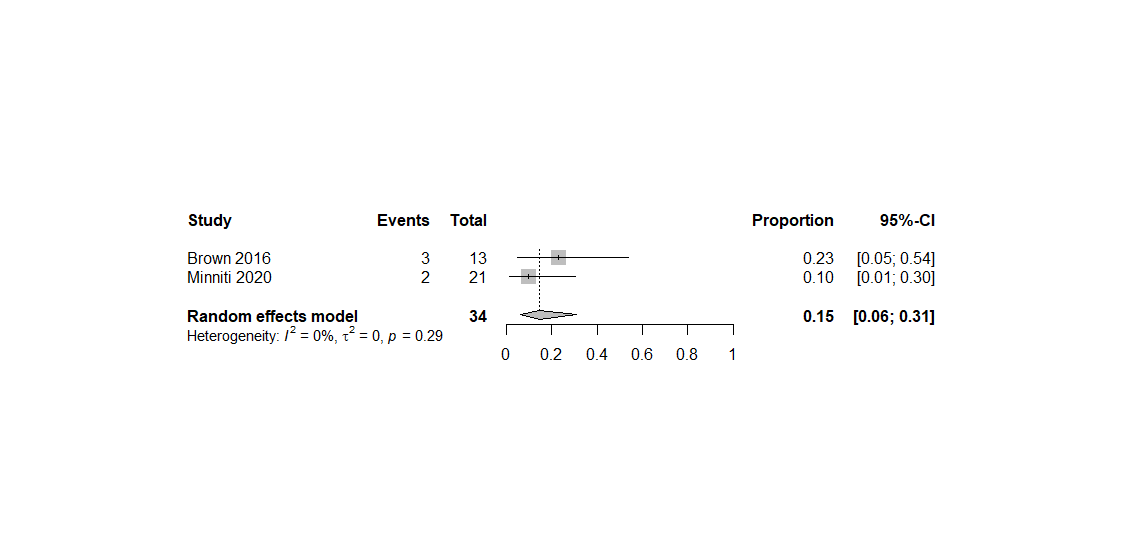


Executive function [32]


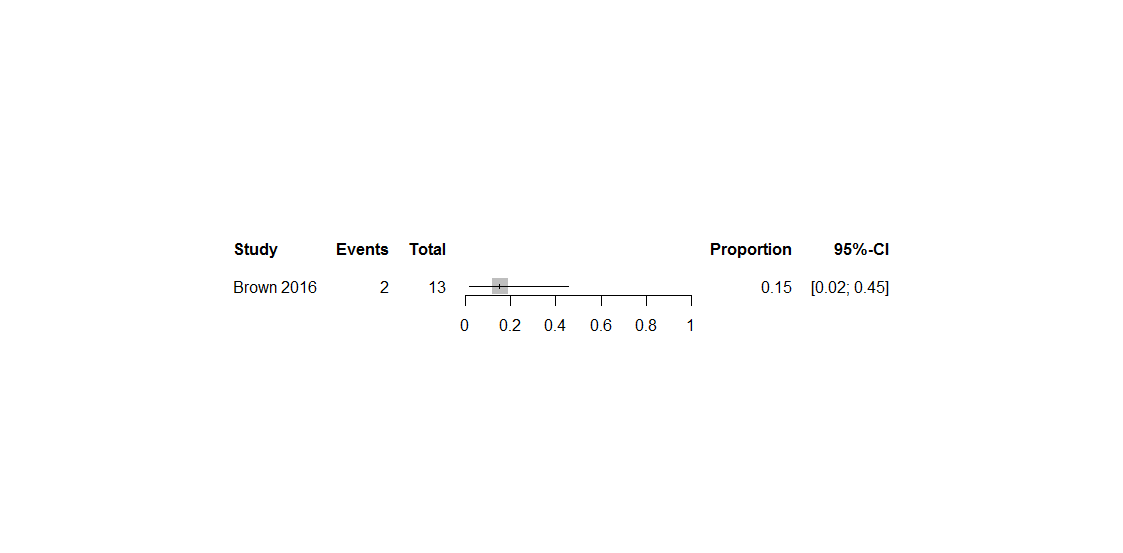


Verbal fluency [32]


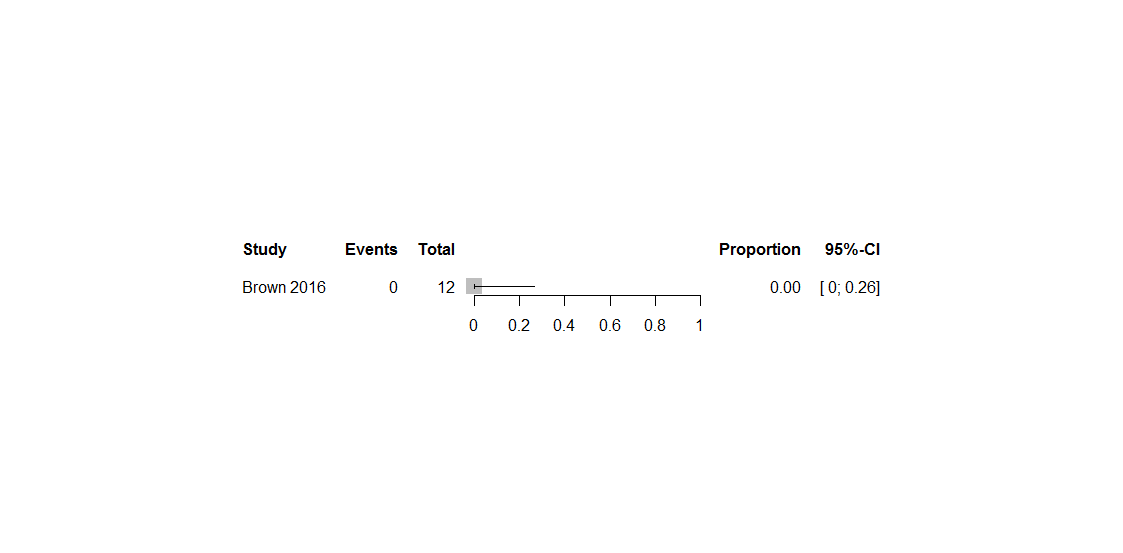


Information processing speed [32]


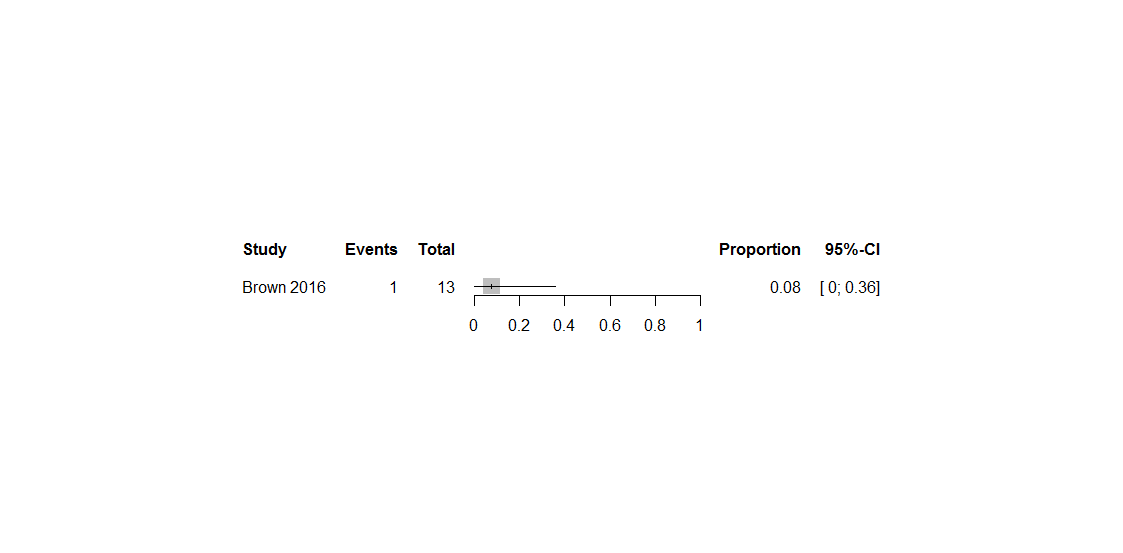


Fine motor coordination [32]


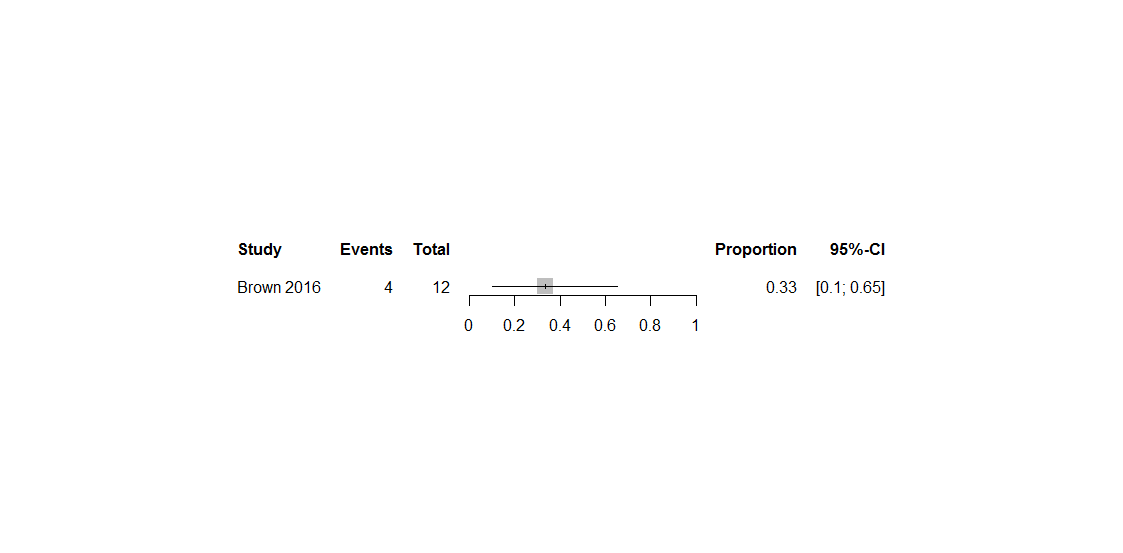

Supplement: Supplementary file 1 [file 30638385]
